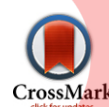

# MNK1-Induced eIF-4E Phosphorylation in Myeloma Cells: A Pathway Mediating IL-6-Induced Expansion and Expression of Genes Involved in Metabolic and Proteotoxic Responses

Yijiang Shi<sup>1,2,3</sup>, Patrick Frost<sup>1,2,3</sup>, Bao Hoang<sup>1,2,3</sup>, Yonghui Yang<sup>1,2,3</sup>, Carolyn Bardeleben<sup>1,2,3</sup>, Joseph Gera<sup>1,2,3</sup>, Alan Lichtenstein<sup>1,2,3\*</sup>

**1** Department of Medicine, Hematology-Oncology, Greater Los Angeles VA Healthcare Center, Los Angeles, California, United States of America, **2** Department of Medicine, UCLA School of Medicine, Los Angeles, California, United States of America, **3** Jonsson Comprehensive Cancer Center, Los Angeles, California, United States of America

## Abstract

Because multiple myeloma (MM) cells are at risk for endoplasmic reticulum (ER) stress, they require a carefully regulated mechanism to promote protein translation of selected transcripts when proliferation is stimulated. MAPK-interacting kinases (MNKs) may provide this mechanism by enhancing cap-dependent translation of a small number of critical transcripts. We, thus, tested whether MNKs played a role in MM responses to the myeloma growth factor interleukin-6 (IL-6). IL-6 activated MNK1 phosphorylation and induced phosphorylation of its substrate, eIF-4E, in MM lines and primary specimens. MNK paralysis, achieved pharmacologically or by shRNA, prevented MM expansion stimulated by IL-6. A phosphodeficient eIF-4E mutant also prevented the IL-6 response, supporting the notion that MNK's role was via phosphorylation of eIF-4E. Both pharmacological MNK inhibition and expression of the phosphodeficient eIF-4E mutant inhibited MM growth in mice. Although critical for IL-6-induced expansion, eIF-4E phosphorylation had no significant effect on global translation or Ig expression. Deep sequencing of ribosome-protected mRNAs revealed a repertoire of genes involved in metabolic processes and ER stress modulation whose translation was regulated by eIF-4E phosphorylation. These data indicate MM cells exploit the MNK/eIF-4E pathway for selective mRNA translation without enhancing global translation and risking ER stress.

**Citation:** Shi Y, Frost P, Hoang B, Yang Y, Bardeleben C, et al. (2014) MNK1-Induced eIF-4E Phosphorylation in Myeloma Cells: A Pathway Mediating IL-6-Induced Expansion and Expression of Genes Involved in Metabolic and Proteotoxic Responses. PLoS ONE 9(4): e94011. doi:10.1371/journal.pone.0094011

**Editor:** Venugopalan Cheriya, Texas A&M University, United States of America

**Received:** September 13, 2013; **Accepted:** March 13, 2014; **Published:** April 8, 2014

**Copyright:** © 2014 Shi et al. This is an open-access article distributed under the terms of the Creative Commons Attribution License, which permits unrestricted use, distribution, and reproduction in any medium, provided the original author and source are credited.

**Funding:** National Institutes of Health grants 2R01CA111448, 1R01CA132778 and 1R21CA168491; research funds of the Veteran's Administration; The Multiple Myeloma Research Foundation. The funders had no role in study design, data collection and analysis, decision to publish or preparation of the manuscript.

**Competing Interests:** The authors have declared that no competing interests exist.

\* E-mail: alan.lichtenstein@med.va.gov

## Introduction

Regulation of protein translation is important in MM because the significant rate of Ig production places the malignant plasma cell at risk for endoplasmic reticulum (ER) stress-induced death. Thus, the MM cell faces a dilemma: although unrestrained translation may be injurious due to enhanced ER stress, the cell requires a regulated mechanism to promote translation when proliferative signals arise. Such a mechanism would allow for the temporary upregulated translation of specific proliferation-dependent proteins but still retain control over global translation. The eIF-4E translation initiation factor could play such a role as it mediates tight regulation of expression of selected proteins [1].

The MAP kinase-interacting kinases 1 and 2 (MNK1 and MNK2) initially bind to eIF-4G and subsequently phosphorylate eIF-4E on S209, thus promoting eIF-4E's activity [2]. Although the physiologic function of such phosphorylation has been unclear because MNK1/2 double knock out mice exhibit a normal phenotype despite absence of eIF-4E phosphorylation [2], other data support the notion that the MNKs promote tumorigenesis [3–5]. They are highly expressed in several tumor types [6–8] and

enhanced eIF-4E phosphorylation is also observed [3,9,10]. Genetic manipulation of MNKs and with phosphodeficient eIF-4E constructs in pre-clinical models [3,11,12] also support a role for MNKs in tumor development. MNK-induced eIF-4E phosphorylation correlates with an increased translational efficiency of a subset of mRNAs encoding tumor-promoting proteins [4].

One particular scenario where the MNK kinases and eIF-4E may promote MM tumor growth is during Interleukin-6 (IL-6)-mediated expansion. IL-6-induced MM cell proliferation is mediated by signaling through the ERK MAPK pathway [13] and MNKs are activated downstream of this pathway [14]. Furthermore, since MNK activity and eIF-4E phosphorylation have minimal effects on overall translation in non-transformed cells [2], this pathway could be exploited by MM cells for translation of specific transcripts for a proliferative response while preventing marked increases in ER stress. We, thus, initiated the current study to test this hypothesis. Our results confirm the notion that MNK activity and eIF-4E phosphorylation are required for IL-6-induced MM cell expansion but do not stimulate significant increases in global translation. Deep sequencing of ribosome-protected transcripts identified a surprising number of genes

involved in metabolism and ER stress whose translation was regulated by eIF-4E phosphorylation. These results identify MNK-induced eIF-4E phosphorylation as a promising therapeutic target in MM.

## Materials and Methods

### Cell lines, plasmids, transfections

The MM cell lines were obtained from ATCC. The lentiviral vectors targeting MNK1 were purchased from Sigma-Aldrich. The HA-tagged eIF-4E full length coding sequence was isolated from pHA-eIF4E (obtained from Addgene, plasmid 17343) by PCR. Insert from pLenti6/gfp-*lacZ* vector was removed by *Spe*I/*Xho*I digestion and replaced with *Spe*/XhoI-digested HA-eIF-4E to yield pLenti6HA-eIF4E. The serine to alanine (SA) and serine to aspartic acid eIF-4E mutants were constructed using the QuikChange site-directed mutagenesis kit (Stratgene). Lentiviral infection of MM cells was performed as previously described [15].

### Primary myeloma specimens and ethics statement

Primary cells were purified from marrow of patients as described [16]. The purity by microscopy and CD138 flow analysis was >95% plasma cells. Marrow samples were obtained after informed consent in accordance with the Declaration of Helsinki, as approved by the West LA VA Institutional Review Board (IRB). The IRB of the VA West LA Medical Center approved this study. Written informed consent was obtained from all patients for use of their bone marrow sample in the research.

### MNK In vitro kinase assay

The MNK kinase assay was carried out as described [17] with modifications. Cells were lysed with lysis buffer. Direct covalent

attachment of MNK1 (Santa Cruz) and MNK2 (Sigma) antibodies to the agarose beads were performed with Pierce Direct IP Kit (Thermo Fisher Scientific). Labeled beads were washed with kinase buffer before 1  $\mu$ g purified GST fusion eIF-4E protein (purchased from BPS Bioscience) was added. Reaction mixtures were incubated at 30°C for 30 minutes in the presence of 25 mM ATP. After SDS-PAGE, phosphorylated eIF-4E proteins were detected by Western blots.

### Xenograft experiments

8226 cells ( $10^7$ /mouse) were injected subcutaneously (SQ) admixed with matrigel into NOD/SCID mice as described [18]. When tumor volume reached 200 mm<sup>3</sup>, mice were randomized to control (0.5%DMSO), low dose 4-amino-3-(p-fluorophenylamino)pyrazolo (3,4-d)pyrimidine (CGP57380) (20 mg/kg) or high dose CGP57380 (50 mg/kg) groups and received daily intraperitoneal (IP) injections. Tumor volume was calculated as previously described [18]. Mice were also challenged SQ with  $10^7$  EV-transfected 8226 cells in the right flank versus  $10^7$  8226 cells transfected with a dominant negative eIF-4E construct. This study was carried out in strict accordance with the recommendations in the Guide for the Care and Use of Laboratory Animals in the NIH. The protocol was approved by the IACUC committee of the West LA VA Hospital. All efforts were made to minimize suffering to animals.

### AHA incorporation assay

The AHA incorporation assay for estimating global translation was performed as previously described [19]. Briefly, cells were treated with IL-6 or pp242 in methionine-free media (Invitrogen), followed by a 30 minute exposure to 100  $\mu$ M AHA (Azidohomoalanine, (Invitrogen)), a methionine analog to pulse label newly

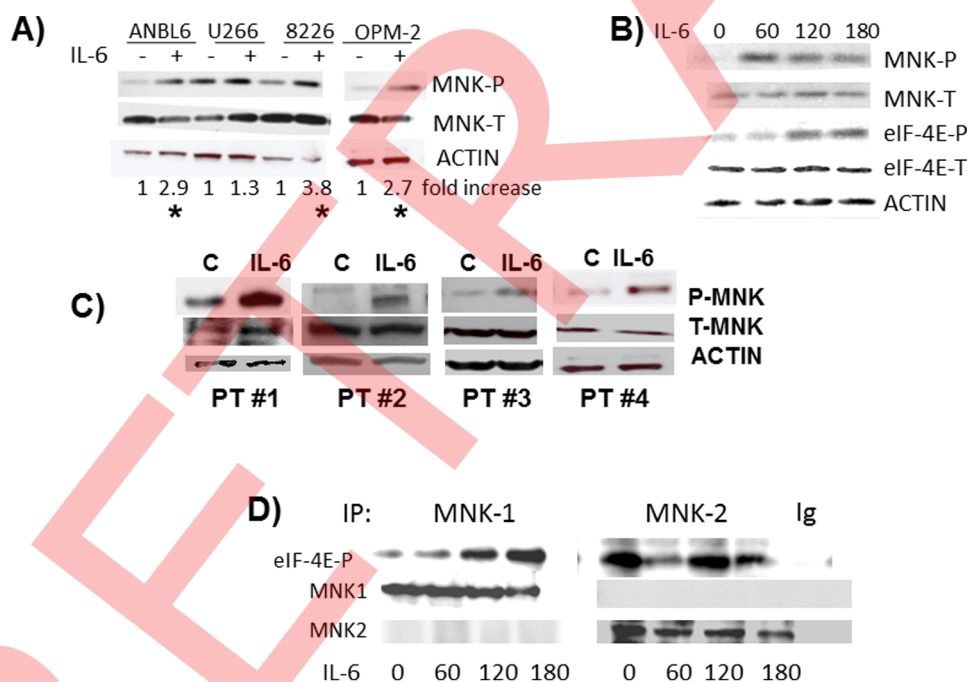

**Figure 1. Activation of MNK kinases.** **A)** MM lines exposed to IL-6 (100 U/ml) for 3 hrs followed by immunoblot assay for phospho-MNK and total MNK expression. Fold increase is determined by densitometric ratio of MNK-P/MNK-total and represents the mean of 3 independent experiments. \* denotes IL-6-induced increase is statistically significant ( $p < 0.05$ ). **B)** ANBL-6 cells exposed to IL-6 for 0, 60, 120 or 180 mins, followed by immunoblot assay. **C)** Primary cells from 4 patients exposed to IL-6 or media (C) followed by immunoblot assay. **D)** ANBL-6 cells treated with IL-6 for increasing durations, followed by immunoprecipitation with anti-MNK1, MNK2 or control IgG. Immunoprecipitates tested for phosphorylation of eIF-4E in vitro. doi:10.1371/journal.pone.0094011.g001

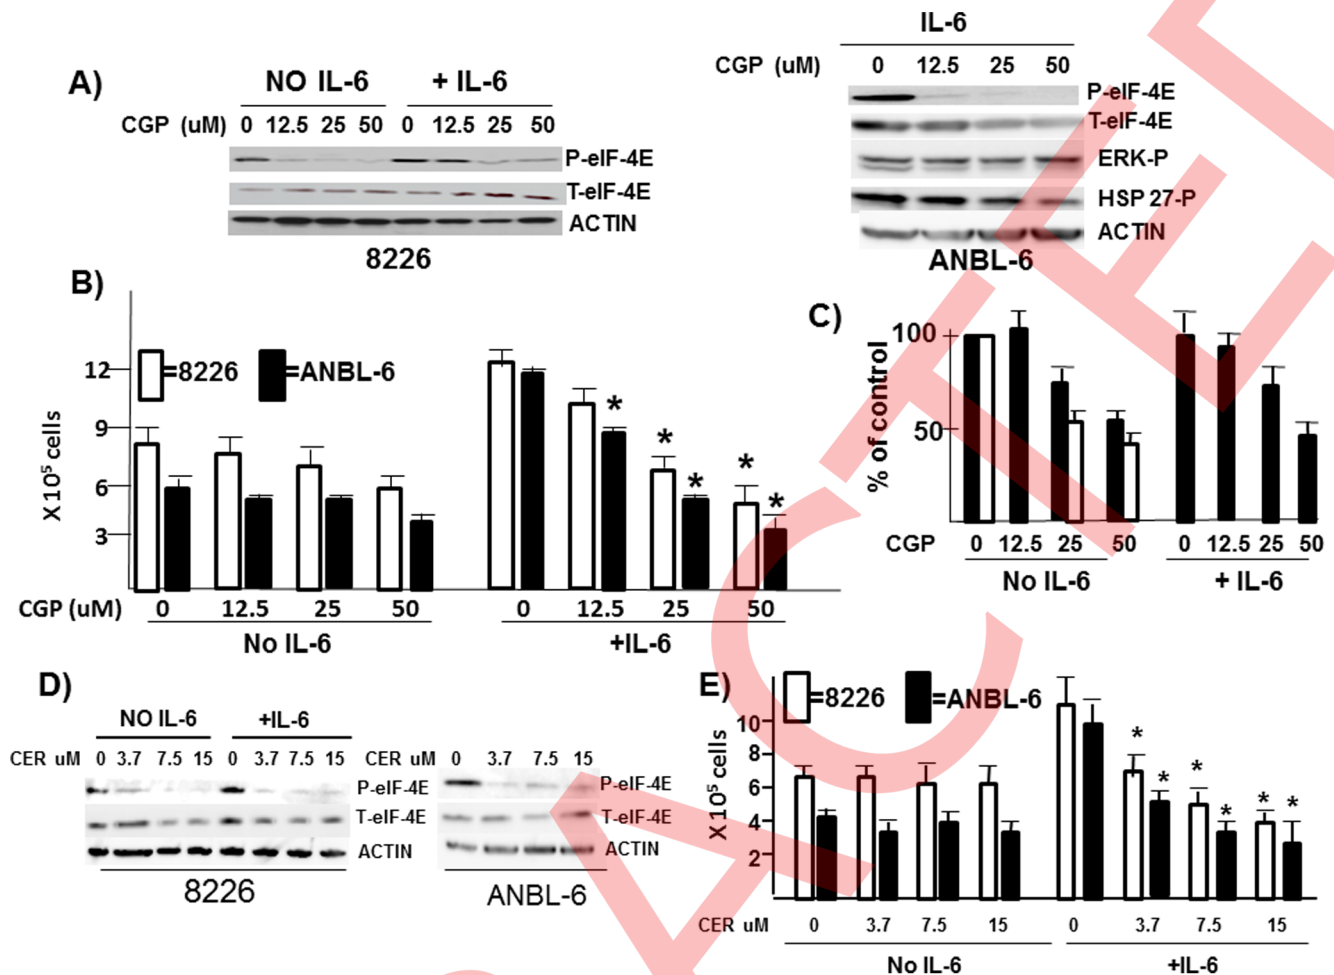

**Figure 2. Effect of CGP57380.** **A)** 8226 (left panel) or ANBL-6 (right panel) MM cells pre-treated with CGP57380 for 30 mins at varying concentrations, followed by addition of IL-6 (100 U/ml) for 3 hrs or no IL-6 and then immunoblot assay performed. **B)** 8226 (white bars) and ANBL-6 (black bars) seeded at  $3 \times 10^5$  cells/ml and treated +/- CGP57380 (at concentrations shown in uM) +/- IL-6 (100 U/ml) for 72 hrs. Viable cell counts enumerated by trypan blue exclusion. Results shown are means  $\pm$  SD, (n=3). \* denotes significant ( $p < 0.05$ ) inhibition of cell numbers versus control (no CGP57380). **C)** Two primary MM specimens cultured +/- CGP57380 for 72 hrs with viable cell recovery enumerated (cell counts presented as mean  $\pm$  SD of triplicate samples). In one patient (black bars) cells also exposed +/- IL-6 (100 U/ml) and in a second patient (white bars) no IL-6 was used (insufficient cell numbers harvested for these extra groups). **D)** 8226 or ANBL-6 cells pre-treated with cercosporamide (cer) for 30 mins at varying concentrations, followed by the addition of IL-6 for 3 hrs or no IL-6 and then immunoblot assay performed. **E)** 8226 and ANBL-6 cells seeded as in fig 2B and treated +/- cercosporamide at varying concentrations +/- IL-6 for 72 hrs. Viable cell counts are means  $\pm$  SD (n=3) and \* denotes significant ( $p < 0.05$ ) inhibition versus control.  
doi:10.1371/journal.pone.0094011.g002

synthesized proteins. After cell lysis, incorporated AHA was detected using the TAMRA Click-iT protein Analysis Detection Kit (Invitrogen). Ten ug total protein was loaded per well. Following detection of newly synthesized protein, gels were also immunoblotted for GAPDH expression. TAMRA fluorescence (newly synthesized protein) was detected using a FujiFilm LAS-4000 system and analyzed using Multi Gauge V3.0 software. Newly synthesized protein levels were normalized to the GAPDH Western blot intensities.

#### Ribosome protection assay

Ribosome profiling was performed as previously described [20,21]. Briefly, IL-6-treated MM cells were cultured on 15-cm plates. Media was changed to fresh media supplemented with 100 ug/ml cycloheximide 5 minutes before harvesting. Cells were then washed with cold PBS supplemented with cycloheximide, followed by the addition of lysis buffer. Lysates were then filtered

through 26 g needles and cleared by centrifugation at 13,000 g for 10 mins. The supernatants were treated with 1 unit/ml RNase at 25°C for 45 mins and digested samples were layered on top of 1 M sucrose cushion and centrifuged in a SW41 Ti rotor at 220,000 rpm to isolate ribosome protected fragments. RNA was extracted with MiRNeasy kit (Qiagen). Suspended RNA was then separated on a 15% TBE-Urea gel and fragments around 30 bp were excised, recovered and used to make cDNA libraries, using the ARTseq Ribosome profiling kit (Epicenter).

#### Ribosome profile analysis

Analysis was carried out using the galaxy program. Before alignment, reads were groomed and trimmed to remove artifacts. These reads were first aligned to a database of rRNA sequences to remove potential rRNA contaminating reads. The remaining reads were aligned against a library of transcripts from UCSC known gene database GRCh37/hg19. Comparison of FPKM

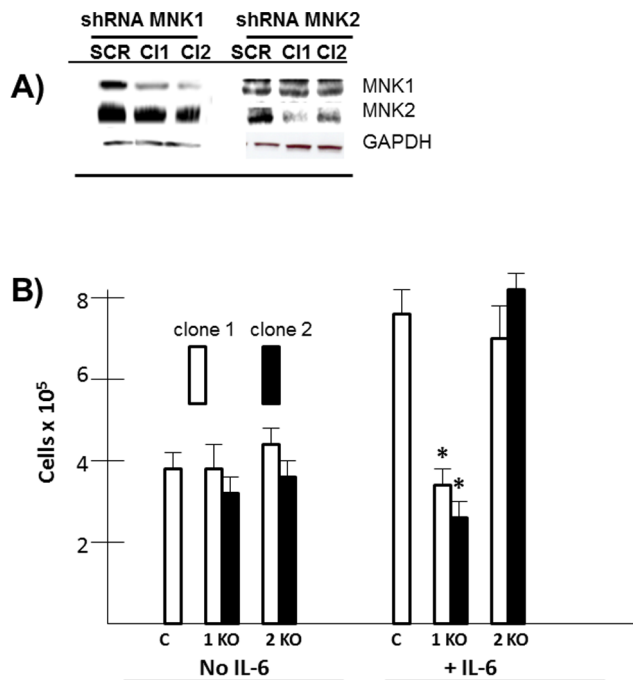

**Figure 3. Effect of MNK shRNA.** **A)** ANBL-6 MM cells infected with lentiviral shRNA targeting MNK1 or MNK2 or a scrambled sequence (SCR, control), followed by immunoblot. **B)** ANBL-6 cell lines knocked down for MNK1 (1KO) or MNK2 (2KO), seeded at  $3 \times 10^5$  cells/ml and then treated +/- IL-6 for 72 hrs with determination of viable cell recovery by trypan blue exclusion. Data shown are mean +/- SD, (n=5) and \* denotes statistically significant reduced recovery in MNK-silenced lines compared to control (C).  
doi:10.1371/journal.pone.0094011.g003

(fragments per kilobase of exon per million fragments mapped) between ribosome footprints and mRNAs in empty vector or mutant eIF-4E-stably transfected groups were made with Cuffdiff program. Translational efficiency was calculated by FKPM footprint/FKPM mRNA for each transcript. Those with sums of reads from footprint + mRNA above 125 were selected out for further analysis. Comparing translational efficiency identified 166 genes whose translation was significantly inhibited in mutant-expressing cells ( $\log_2 \leq -1.5$ ). Results of deep sequencing of total RNA samples and ribosome-protected RNA are posted on the NCBI Sequence Read Archive website with the accession number of SRP033310.

## Ig ELISA

Ig ELISA assays were performed on lysates from 8226 cells using the Human Lambda ELISA Quantification SET (Bethyl Laboratories, cat #E80-116).

## Statistics

Quantitative increases in protein phosphorylation on Western blots were evaluated by densitometric analysis. All Western blots were repeated at least 3 times. The t-test was used to determine significance of differences between groups.

## Results

### IL-6 activates MNK kinases in MM cells

Initial experiments tested the ability of IL-6 to activate MNK kinases. MM cell lines were incubated with IL-6 for 3 hrs followed

by immunoblot assay for expression of phosphorylated MNK. The antibody used detects phosphorylated MNK1 as well as MNK2. As shown in fig 1A IL-6 successfully upregulated phosphorylation of MNK in ANBL-6, 8226 and OPM-2 cells. The minimal activation in U266 cells may relate to the fact that this cell line auto-stimulates itself by secreting IL-6 [22]. In time course experiments (example in fig 1B), IL-6 induced MNK phosphorylation as early as 60 mins. In addition, the activation of MNK kinases was temporally correlated with enhanced phosphorylation of eIF-4E (fig 1B), a substrate of MNKs [2]. IL-6 is also capable of activating MNKs in primary MM cells as shown in fig 1C (2.7, 3.6, 2.2 and 3.1 x fold increase in P-MNK/T-MNK ratio in patients #1, #2, #3 and #4 respectively by densitometry).

To ascertain if IL-6 was activating MNK1 or MNK2, we performed in vitro kinase assays (Fig 1D). MM cells were exposed to media alone or IL-6 (100 U/ml) for increasing durations. MNK1 or MNK2 was then immunoprecipitated from protein lysates with anti-MNK-1, anti-MNK-2 or Ig control and tested for its ability to phosphorylate eIF-4E in vitro. As shown in fig 1D, the immunoprecipitating antibodies were specific for MNK1 or MNK2 without cross reactivity. The immunoprecipitated MNK1 from IL-6-treated MM cells demonstrated a significantly increased ability to phosphorylate eIF-4E relative to control cells which was time-dependent. In contrast, greater constitutive basal MNK2 kinase activity was present as previously described [23] but not significantly increased by exposure to IL-6.

### Inhibition of MNK kinases prevent IL-6-induced stimulation of growth

Subsequent experiments were performed with the ANBL-6 and 8226 MM cell lines as their in vitro growth is known to be affected by exogenous IL-6 [13,24]. To test a role for MNKs in IL-6 MM responses, we exposed these lines to the MNK inhibitor CGP57380 [25]. CGP57380, at the concentrations used, inhibits both MNK1 and MNK2 activity [26]. Using eIF-4E phosphorylation as a monitor for MNK kinase activity, fig 2A (left panel) demonstrates that, in both IL-6-treated and non-treated 8226 cells, CGP57380 exposure prevented eIF-4E phosphorylation in a dose-dependent fashion. For ANBL-6 cells (right panel), there was no basal constitutive MNK phosphorylation whose sensitivity could be tested (not shown). However, IL-6-induced phosphorylation was similarly sensitive to the MNK inhibitor. CGP57380 was somewhat more effective in IL-6-treated ANBL-6 cells with 83% inhibition ( $83 \pm 5\%$ , n=3) at 12.5 uM while IL-6-treated 8226 cells required 25 or 50 uM for abrogation of eIF-4E phosphorylation. Part of this greater sensitivity is probably due to the ability of CGP57380 in ANBL-6 cells to also modestly inhibit expression of total eIF-4E. However, as shown in fig 2A, right panel, the inhibitory effect of CGP57380 on total and phospho-eIF-4E expression in IL-6-treated ANBL-6 cells was relatively specific as no significant effect on ERK or hsp27 phosphorylation was present (hsp 27 is a phosphorylation target of p38MAPK). We next used CGP57380 at these concentrations and tested its effect on IL-6-stimulated MM cell growth (fig 2B). ANBL-6 (black bars) and 8226 (white bars) cell growth was significantly stimulated by IL-6 (100 U/ml). Concurrent exposure to CGP57380 prevented IL-6-stimulated growth in a concentration-dependent fashion in both cell lines. In contrast, there was little effect against cells cultured in the absence of IL-6. Identical results were obtained after 48 hrs incubation (not shown) and CGP57380, used at 25 uM, inhibited cell growth at all concentrations of IL-6 (fig S1). Flow cytometric assays in MM cells stimulated +/- IL-6 in the presence of 25 uM CGP57380 (inhibiting eIF-4E phosphorylation by >90% (fig 2A)), demonstrated no significant induction of apoptosis (fig S2).

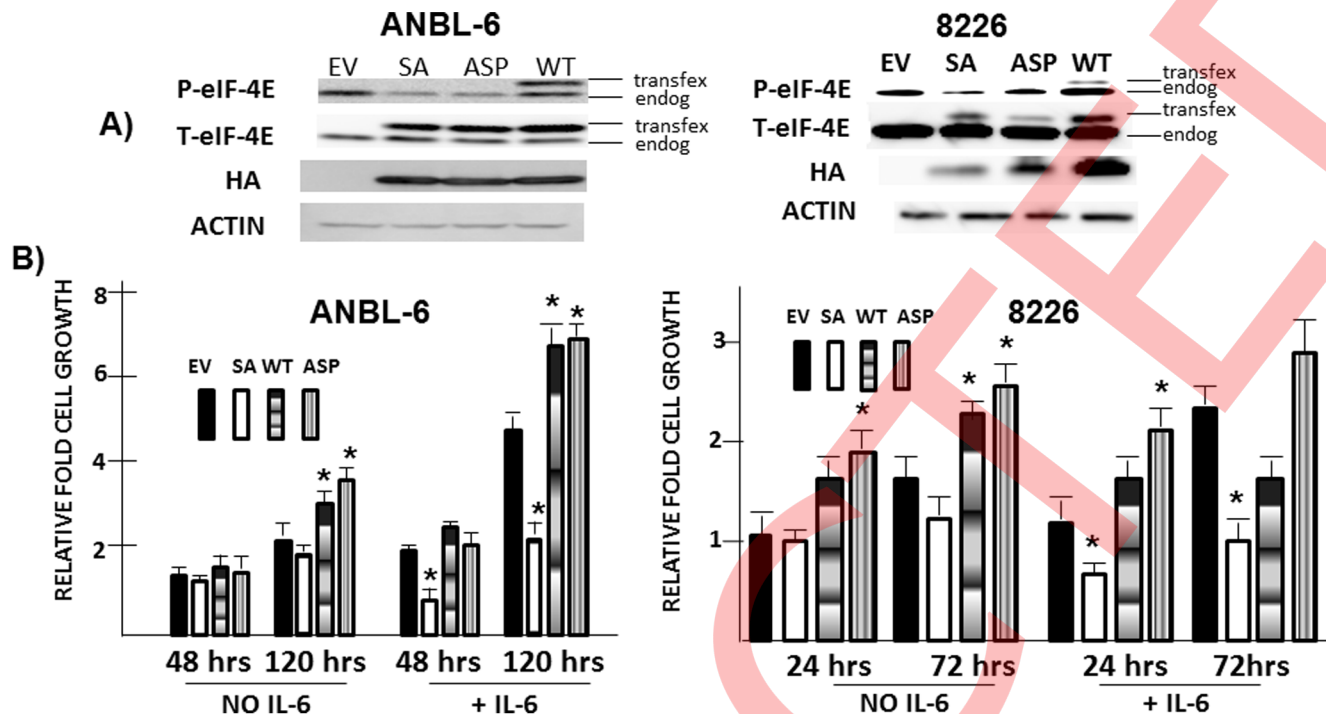

**Figure 4. Effect of eIF-4E mutants.** **A)** ANBL-6 or 8226 cells transfected with empty vector (EV), serine-to-alanine phosphodeficient eIF-4E (SA), serine-to-aspartic acid phosphomimetic eIF-4E (ASP) or wild type (WT) eIF-4E, followed by immunoblot assay. Transfected (transfex) vs endogenous (endog) eIF-4E denoted. **B)** Above described ANBL-6 and 8226 transfected cell lines treated +/- IL-6 (100 U/ml) for varied durations and viable cell recovery enumerated. Results are relative cell growth compared to number of cells present at time 0 (mean +/- SD (n = 3)). \* denotes statistically significant (p < 0.05) alteration in cell recovery versus empty vector-transfected cells. doi:10.1371/journal.pone.0094011.g004

We also had the opportunity to test the effect of the CGP57380 inhibitor against two primary MM cell specimens (fig 2C), cultured for 96 Hrs. In contrast to the results described above in ANBL-6 and 8226 cells, CGP57380 at 25 or 50  $\mu$ M significantly inhibited short term 1<sup>o</sup> MM cell survival in the absence of IL-6 in both specimens as well as when IL-6 was present.

Although frequently used experimentally as a MNK inhibitor, CGP57380 can inhibit additional kinases as potently as MNK [27]. We, thus, also tested cercosporamide, a MNK inhibitor with greater specificity. Cercosporamide has very limited activity against a panel of 76 other kinases [28]. Cercosporamide inhibited phosphorylation of eIF-4E in 8226 cells in the presence or absence of IL-6 as well as in IL-6-treated ANBL-6 MM cells (fig 2D). Very significant inhibition was present with the lowest concentration tested, 3.7  $\mu$ M. This inhibitor also prevented IL-6-stimulated 8226 and ANBL-6 in vitro growth as shown in fig 2E while having little effect on MM cell growth in the absence of IL-6, similar to what was shown with the CGP57380 inhibitor. Thus, two independent inhibitors prevent MNK-induced phosphorylation of eIF-4E, which correlated nicely with their ability to prevent IL-6-stimulated MM cell growth.

We next used shRNA to knockdown MNK1, MNK2 or both. As shown in fig 3A, targeting 2 separate MNK1 sequences with shRNA (clone 1 & 2; (cl1 & cl2)) resulted in a significant decrease in MNK1 protein expression while having no effect on MNK2. Similarly, targeting MNK2 resulted in inhibited MNK2 expression while having no effect on MNK1. These cell lines were then treated with or without IL-6 and viable cell recovery enumerated 72 hrs later. As shown in fig 3B, in control (C) cells, IL-6 stimulated growth, allowing for an approximate doubling of cell numbers. In IL-6-stimulated MM cells, targeting MNK1 with both

shRNAs significantly inhibited the IL-6 response although MNK1 knockdown in the absence of IL-6 had little effect. In contrast, targeting MNK2 with shRNAs had no effect on the IL-6 response.

### Effects of eIF-4E mutants

To test if MNKs regulate expansion of MM cells via their phosphorylation of eIF-4E, we stably transfected wild type (WT), a serine-to-alanine (SA) mutant (at S209) or serine-to-aspartic acid (ASP) phosphomimetic eIF-4E mutant into ANBL-6 and 8226 MM cells. Figure 4A demonstrates successful expression of the transgenes by immunoblot assay for the HA tag and total eIF-4E compared to empty vector (EV)-transfected cells. As can be seen in fig 4A, ectopic expression of both SA and ASP mutants significantly inhibited phosphorylation of endogenous eIF-4E in both lines. Although the ectopic expression of the phosphomimetic ASP mutant should maintain normal-to-heightened eIF-4E function in transfected cells (as expected, it is not recognized by an antibody specific for eIF-4E phosphorylated on serine 209 (fig 4A)), the SA mutant should act as a dominant negative. The transfected MM clones were then cultured with or without IL-6 for 48–120 hrs. As shown in fig 4B, IL-6 was successful in stimulating expansion of MM clones in EV-, WT- and phosphomimetic ASP-transfected cells. In ANBL-6 cells, ectopic expression of WT and phosphomimetic eIF-4E significantly enhanced cell growth in the absence or presence of IL-6 at the 120 hr time point. Likewise, WT and phosphomimetic eIF-4E enhanced 8226 cell growth in the absence or presence of IL-6 (latter at 24 hrs). However, the SA dominant negative-transfected cells were significantly curtailed in their IL-6 response for ANBL-6 cells (left panel) and 8226 cells (right panel).

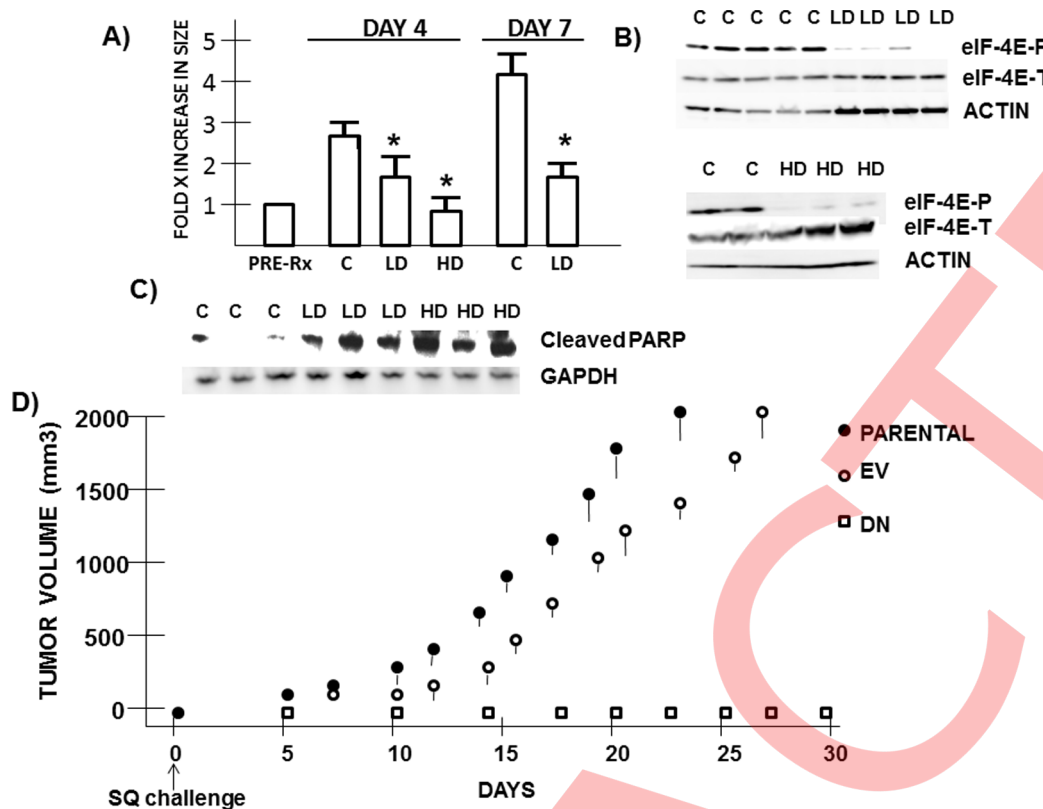

**Figure 5. Effect of MNK/eIF-4E inhibition in vivo.** **A)** 8226 cells injected SQ and mice randomized to control (C) group, low dose CGP57380 (LD, 20 mg/kg) or high dose (HD, 50 mg/kg). Treatment is daily IP injections. At day +4 and +7 of treatment, tumors were measured. Data is tumor volume, mean $\pm$ SD (n=8). \* = significantly (p<0.05) smaller tumor vs control. **B and C)** Individual control (C), high dose (HD)-treated or low dose (LD)-treated tumors harvested after 3 days of treatment for Western blot, assaying phospho-eIF-4E, total eIF-4E, GAPDH and PARP that has been cleaved by caspase (AB #954 from Cell Signaling). **D)** Mice challenged SQ with 8226 cells transfected with EV (right flank) and 8226 cells transfected with dominant negative eIF-4E (left flank). A separate cohort of mice were challenged with non-transfected parental 8226 cells. Tumor growth is mean $\pm$ SD tumor volume, n=8. doi:10.1371/journal.pone.0094011.g005

Although the above described inhibitory effects of our dominant negative eIF-4E mutant strongly support the notion that IL-6-induced, MNK-dependent MM cell growth is, in part, due to a MNK-specific phosphorylation of eIF-4E, MNKs have other substrates that could be playing a role. In particular, MNK kinases can phosphorylate hn RNP A1 (A1) [26] and we have previously shown that A1 function in MM cells participates in IL-6-mediated growth [29]. It was also possible that our ectopically expressed SA mutant could out-compete A1 for binding to MNK1 and, thus, effectively prevent MNK phosphorylation of A1. Since antibodies for detecting A1 phosphorylation are not available, we investigated this issue indirectly. A1 binds to the 3'UTR of TNF-alpha at AU-rich elements (AREs) and, in so doing, restrains TNF expression. The one reported effect of MNK1-induced phosphorylation of A1 is to decrease its binding to TNF-alpha AREs resulting in upregulated TNF expression [26]. We, thus, reasoned that, if the SA eIF-4E phosphomutant prevented MNK1 phosphorylation of hn RNP A1, it would prevent or inhibit TNF expression. In MM cells infected with shRNA to silence hn RNP A1 (fig S3A), significantly enhanced TNF-alpha expression occurred (fig S3B), confirming a regulatory role of A1. Thus, A1 regulates TNF-alpha expression in our cells, presumably via its binding to the 3'UTR AREs. When we tested TNF-alpha expression in SA phosphomutant-expressing cells, TNF $\alpha$  expression was not curtailed (fig S3B). As the LPS TNF-alpha response is dependent upon MNK1-induced A1 phosphorylation [26], these data support the

hypothesis that the SA mutant is not preventing A1 phosphorylation as an off-target effect.

### Effects of MNK/eIF-4E inhibition in vivo

In xenograft models, 8226 tumor cells were injected SQ and, when tumor volume reached 200 mm<sup>3</sup>, mice were randomized to receive DMSO vehicle alone IP daily, or CGP57380 at 20 mg/kg (low dose (LD)) or 50 mg/kg (high dose (HD)). While MM growth progressed in control mice, both CGP57380 dose cohorts demonstrated an anti-tumor effect which was significant by 4 days of treatment (Fig 5A). Unfortunately, 50 mg/kg of CGP57380 was also toxic with weight (wt) loss and hunched over posture being evident. By 8 days of high dose CGP57380, 50% of treated mice succumbed although without significant tumor growth. At the lower dose of CGP57380, mice remained healthy without wt loss and with obvious anti-tumor effects at day+7 (fig 5A). When mice with equal-sized tumors were either treated with HD or LD CGP57380 (fig 5B) or DMSO (control) for 3 days followed by Western blot assay on extracted tumor protein, it is evident that the MNK inhibitor prevented eIF-4E phosphorylation in vivo (fig 5B). This was associated with a caspase-dependent cleavage of PARP (fig 5C), signifying activation of apoptosis. It is unclear to us why CGP57380 used in vivo resulted in MM cell apoptosis but not during in vitro exposure (fig S2). CGP57380

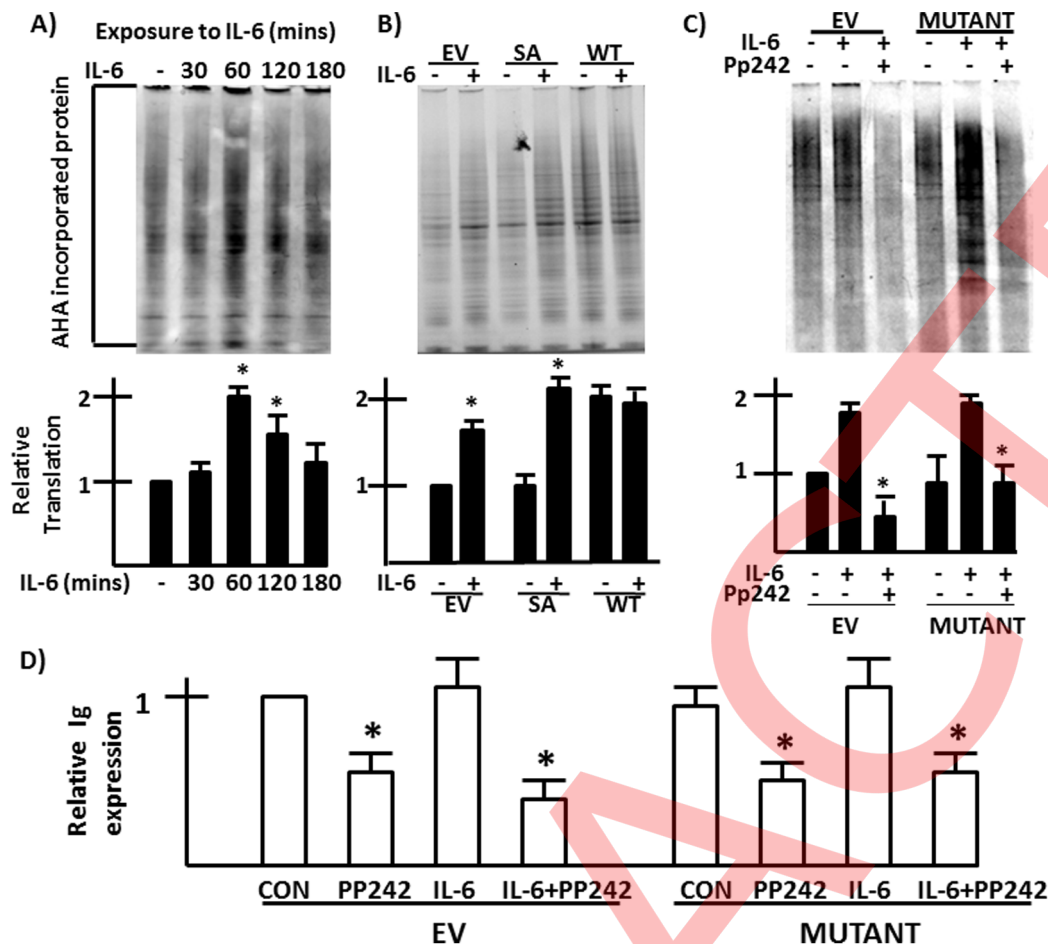

**Figure 6. Effects on global translation and lambda light chain synthesis.** **A)** AHA incorporation is tested in MM cells stimulated with IL-6 for 30, 60, 120 or 180 mins. In **B)**, AHA incorporation is tested in IL-6-stimulated EV-, WT or mutant SA eIF-4E-transfected MM cells. In **C)**, EV or SA mutant-expressing cells are pre-treated +/- pp242, followed by IL-6. Bar graphs under panels are means +/- SD of 4 separate experiments. \* denotes statistically significant increase in AHA incorporation induced by IL-6 in A and B and decrease versus IL-6-stimulated control in C). **D)** Lambda light chain ELISA assay in MM cell lysates, comparing EV- vs mutant eIF-4E-transfected cells +/- IL-6 and +/- pp242. Data are means +/- SD, n=4. \* denotes statistically significant difference from corresponding controls. doi:10.1371/journal.pone.0094011.g006

injection of mice may disrupt some key viability pathways in vivo which involve interaction of MM cells with their milieu.

Mice were also challenged SQ with  $10^7$  8226 cells either transfected with an empty vector (EV) or the dominant negative eIF-4E mutant (DN). As shown in figure 5D, EV-transfected cells successfully grew out in mice, albeit at a slightly slower rate than parental inocula. In contrast, cells expressing the eIF-4E SA mutant were prevented from in vivo growth. Thus, either inhibiting MNK kinase activity (with CGP57380) or curtailing eIF-4E phosphorylation (with the phosphomutant) will prevent MM growth in mice.

### Effects on protein translation

To assess effects on global translation, we utilized the methionine analog azidohomoalanine (AHA) to label newly translated proteins. By using click chemistry, the AHA-incorporating nascent proteins are labeled with a fluorescent dye as described in Materials & Methods. The fluorescent intensity is determined as an assessment of global translation. Protein loading in the gels is controlled by concurrent immunoblot for GAPDH (see Materials and Methods). ANBL-6 MM cells stimulated with or without IL-6 were incubated with AHA in a short 30 minute time

window to assess newly made proteins. As shown in the representative experiment (Figure 6A) and the bar graph below depicting mean +/- SD increases in translation from 4 experiments, a modest increase in translation occurred which peaked after 60 mins of exposure to IL-6 (1.8 x fold) and returned to baseline by 180 mins. To assess any effect of eIF-4E phosphorylation on the IL-6-upregulated global protein synthesis, we stimulated ANBL-6 cells expressing the dominant negative eIF-4E phosphomutant (vs wild type (WT) eIF-4E-transfected and empty vector cells). As shown in a representative experiment and mean values from 3 independent experiments in the bar graph (Fig 6B), expression of the eIF-4E SA mutant did not decrease basal translation (no IL-6) as compared to empty vector-transfected cells. Furthermore, the ability of IL-6 to modestly enhance (approx 2 x fold) translation was also retained in mutant SA-expressing cells. Wild type (WT) eIF-4E-expressing cells demonstrated enhanced global translation in the absence of IL-6 without further increase when the cytokine was added. Although prevention of IL-6-induced eIF-4E phosphorylation in the SA mutant-expressing cells did not affect global translation, inhibition of mTOR by addition of pp242 ablated translation as shown in fig 6C.

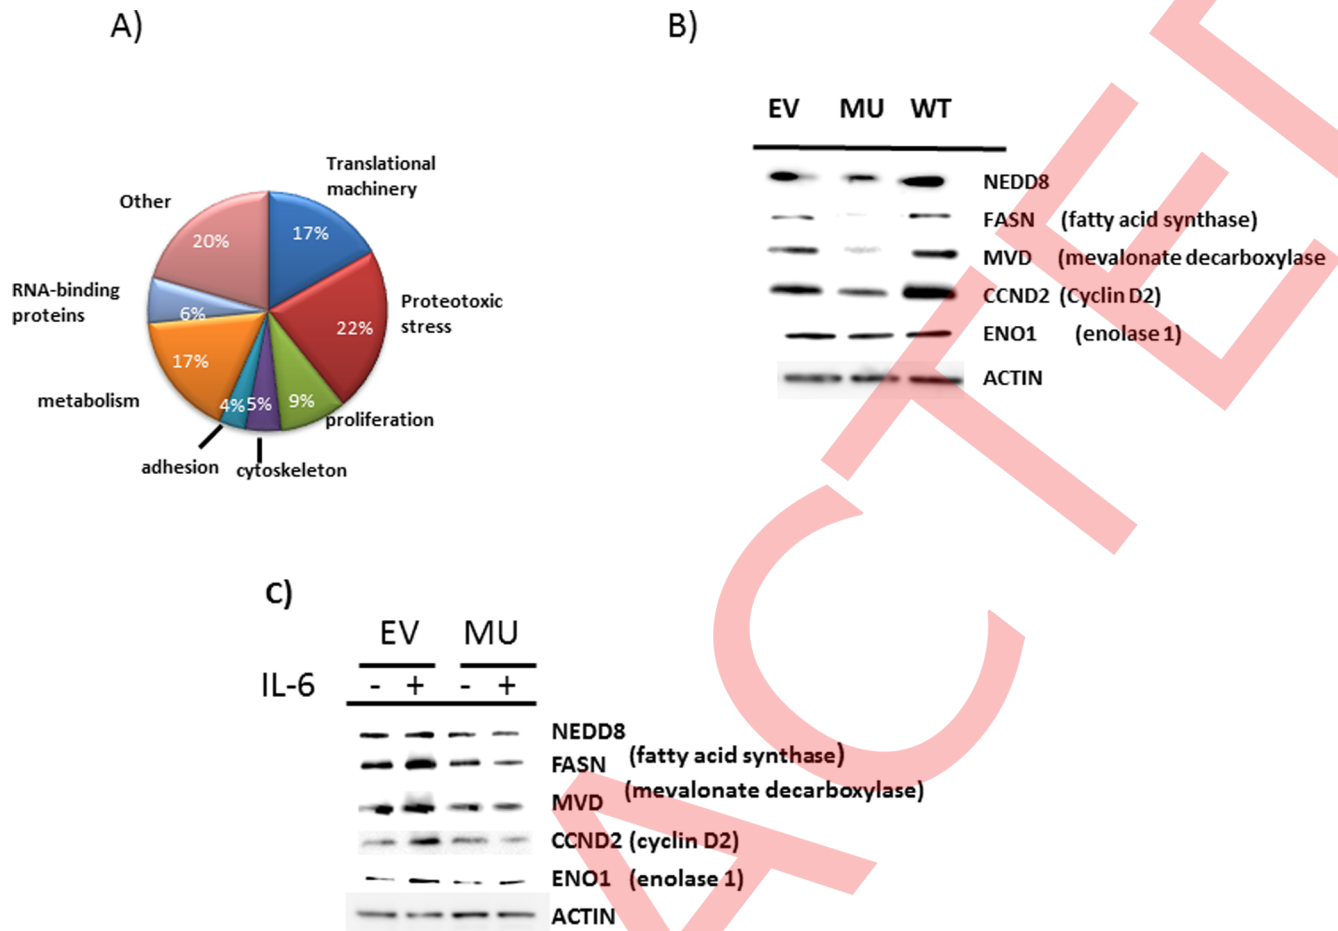

**Figure 7. Ribosome profiling of EV vs mutant eIF-4E-transfected MM cells. A)** Different categories of 166 genes demonstrating significantly inhibited translation in mutant-expressing cells. **B)** Immunoblot analysis of protein expression in EV-, WT and mutant (MU)-expressing MM cells. **C)** Immunoblot analysis of protein expression in EV vs mutant (MU) eIF-4E-expressing MM cells +/- IL-6 for 48 hrs. doi:10.1371/journal.pone.0094011.g007

Since immunoglobulin (Ig) synthesis is a significant portion of protein expression in MM cells, we also tested the effect of the eIF-4E mutant on Ig synthesis. We, thus, tested transfected 8226 cells which synthesize lambda light chains. As shown in figure 6D, IL-6 had a minimal effect on Ig synthesis in 8226 cells while pp242 significantly inhibited. Notably, when compared to EV-transfected 8226 cells, the eIF-4E mutant-transfected cells demonstrated no inhibition of Ig synthesis in the basal or IL-6-stimulated cultures. Collectively, these data indicate that eIF-4E phosphorylation does not affect global basal and IL-6-stimulated protein translation or Ig synthesis.

#### Ribosome-protection assay

To identify mRNAs susceptible to translation inhibition due to prevention of eIF-4E phosphorylation, we utilized transcriptome-scale ribosome profiling as previously described [20,21,30]. Ribosome profiling allows accurate quantification of mRNA fragments undergoing translation (ribosome footprints) as they are protected by ribosomes during digestion with RNase. To identify the mRNAs translationally regulated by eIF-4E phosphorylation, we calculated the induced changes in translational efficiency of each mRNA by normalizing footprint density of each gene to the abundance of the corresponding transcript. We studied control EV-transfected ANBL-6 cells and isogenic cells expressing

the dominant negative eIF-4E both in the presence of IL-6. We detected 14-22 million reads per sample. In total, this corresponded to 1350 unique mRNAs that could be monitored for alterations in their translation. Ribosome profiling revealed 166 target mRNAs whose translation was significantly decreased ( $\log_2 \leq -1.5$ , false discovery rate  $< 0.05$ ) in mutant-containing MM cells compared to control ANBL-6 cells. A second ribosome profiling experiment gave similar results (correlation coefficient  $R = 0.941$ ).

Figure 7A depicts the categories of genes whose expression is regulated by eIF-4E phosphorylation. A large fraction (17%) participate in the translational machinery such as ribosome proteins and elongation factors. This is not surprising since previous results in prostate cancer cells [30] also determined this category of genes was most sensitive to translational inhibition resulting from an active site mTOR inhibitor and we anticipated that eIF-4E phosphorylation-regulated genes would be included in the larger number of mTOR-regulated genes. However, we were surprised to find two additional categories highly represented consisted of metabolism genes (17%) and those involved in ER function and proteotoxic stress responses (22%). These latter genes are listed in figs 8 & 9. All these latter genes demonstrated inhibited translation ( $\log_2 \leq -1.5$ ) but with little effect on mRNA abundance ('RNA' columns in figs 8 & 9) with few exceptions (#8, 17 and 23 in fig 8 (increased transcript level) and #25 and #29 in fig 9 (decreased level of mRNA abundance)). It was also notable

|    | Gene         | Description                                                                    | RNA   |
|----|--------------|--------------------------------------------------------------------------------|-------|
| 1  | ASS1         | Argininosuccinate synthase 1                                                   | -0.14 |
| 2  | ATP5L        | ATP synthase, H <sup>+</sup> transporting, mitochondrial Fo complex, subunit G | 1.42  |
| 3  | ATP6V1G1     | ATPase, H <sup>+</sup> transporting, lysosomal 13kDa, V1 subunit G1            | 0.17  |
| 4  | cytochrome b | Clone 35w unknown mRNA, mitochondrial.                                         | -0.16 |
| 5  | ENO1         | Enolase 1, (alpha)                                                             | -0.17 |
| 6  | FASN         | Fatty acid synthase                                                            | -0.45 |
| 7  | GUK1         | Guanylate kinase 1                                                             | -0.14 |
| 8  | KARS         | Lysyl-tRNA synthetase                                                          | 4.52  |
| 9  | LSS          | Lanosterol synthase (2,3-oxidosqualene-lanosterol cyclase)                     | 0.26  |
| 10 | MTND5        | NADH dehydrogenase subunit 5                                                   | 0.18  |
| 11 | MVD          | Mevalonate (diphospho) decarboxylase                                           | 0.34  |
| 12 | NAA10        | N(alpha)-acetyltransferase 10, NatA catalytic subunit                          | -0.39 |
| 13 | NDUFA11      | NADH dehydrogenase (ubiquinone) 1 alpha subcomplex, 11, 14.7kDa                | 0.35  |
| 14 | NDUFA13      | NADH dehydrogenase (ubiquinone) 1 alpha subcomplex, 13                         | -0.08 |
| 15 | NDUFA3       | NADH dehydrogenase (ubiquinone) 1 alpha subcomplex, 3, 9kDa                    | -0.23 |
| 16 | NDUFB11      | NADH dehydrogenase (ubiquinone) 1 beta subcomplex, 11, 17.3kDa                 | -0.24 |
| 17 | NDUFB6       | NADH dehydrogenase (ubiquinone) 1 beta subcomplex, 6, 17kDa                    | 6.28  |
| 18 | NDUFS3       | NADH dehydrogenase (ubiquinone) Fe-S protein 3, 30kDa                          | 0.15  |
| 19 | NDUFV2       | NADH dehydrogenase (ubiquinone) flavoprotein 2, 24kDa                          | 0.21  |
| 20 | OAZ1         | Ornithine decarboxylase antizyme 1                                             | 0.48  |
| 21 | OGT          | O-linked N-acetylglucosamine (GlcNAc) transferase                              | 0.30  |
| 22 | P4HB         | (P4HB), mRNA.                                                                  | 0.53  |
| 23 | PNP          | Purine nucleoside phosphorylase                                                | 2.57  |
| 24 | PSAP         | Prosaposin                                                                     | 0.31  |
| 25 | PYGB         | Phosphorylase, glycogen; brain                                                 | 0.44  |
| 26 | SCD          | Stearoyl-CoA desaturase (delta-9-desaturase)                                   | 0.41  |
| 27 | TPST2        | Tyrosylprotein sulfotransferase 2                                              | -0.08 |
| 28 | UQCRH        | Ubiquinol-cytochrome c reductase hinge protein                                 | 0.65  |

**Figure 8. Metabolism genes whose translation is inhibited in mutant eIF-4E-containing MM cells.** List of all genes related to metabolism with significant decreases in translational efficiency. 'RNA' value given is log<sub>2</sub> change in RNA abundance in mutant-expressing cells vs EV-cells. doi:10.1371/journal.pone.0094011.g008

that the translationally inhibited metabolism genes (fig 8) included enzymes involved in lipid biosynthesis, such as fatty acid synthetase (FASN, #6), stearoyl-coA desaturase (SCD, #26), lanosterol synthetase (LSS #9) and mevalonate decarboxylase (MVD, #11). Proteotoxic stress response genes (fig 9) included genes responsible for proper folding of proteins (i.e., PP1A, HSP90, HSP70, nucleophosmin (NPM1)), in proteasome function (NEDD8, PSMD3, PSMD7), in UPR responses (CALR) and in translocation of proteins across ER membranes (SSR4, Sec11c, Sec11a, BCAP31, SPCS2, SPCS3, LMAN1). Many of these genes are specifically upregulated at the RNA level in MM [31], supporting their important roles in myelomagenesis.

The remaining genes, translationally inhibited by the mutant eIF-4E, are listed in figs S4 & S5. They include genes encoding RNA-binding proteins (6%), adhesion proteins (4%), cytoskeleton proteins (5%), miscellaneous proteins (17%) and those involved in proliferation/survival (11%). The latter include cyclin D2, SMAP42, defender against cell death (DAD1), PIM2 and POU2AF1. Cyclin D2 is the D cyclin used by these myeloma cells for cell cycle transit and its curtailed expression would certainly contribute to the inhibited growth response to IL-6 caused by the SA dominant negative mutant.

To confirm some of the ribosome profiling data, we utilized Western blot analysis which confirmed the dominant negative

eIF-4E phosphomutant inhibited expression of several genes identified with ribosome profiling. Immunoblot assay performed on extracts of IL-6-stimulated EV-transfected and WT-transfected ANBL-6 cells vs stimulated mutant eIF-4E-containing cells (fig 7B) confirms the inhibitory effect of the SA mutant as seen in the ribosome profiling. In addition, ectopic expression of wild type (WT) eIF-4E appeared to increase expression of several of these proteins (i.e., NEDD8, FASN, MVD and CCND2). An additional experiment (fig 7C) demonstrates the variable stimulation of expression of these genes in IL-6-treated EV cells (most marked for FASN, MVD, CCND2 and ENO1) which was prevented in mutant eIF-4E-containing MM cells.

## Discussion

MM plasma cells have developed several strategies to deal with the risk of ER stress. They have efficient proteasome function, expanded ER membrane development and a heightened UPR mechanism [32,33]. MM cells also exploit mechanisms for repressing generalized TORC1 activity to limit unnecessary protein expression for prevention of further ER stress. For example, MM cells transcriptionally upregulate ARK5 and DEPTOR [34,35], two proteins that suppress TORC1 [35,36] function and global cap-dependent translation. However, when stimulated for proliferative responses, enhanced translation of key

| Gene        | Description                                                               | RNA   |
|-------------|---------------------------------------------------------------------------|-------|
| 1 TPT1      | Tumor protein, translationally-controlled 1                               | 0.07  |
| 2 MZB1      | Marginal zone B and B1 cell-specific protein                              | 0.15  |
| 3 TSPO      | Translocator protein (18kDa) (TSPO), transcript variant PBR-S             | 0.30  |
| 4 NEDD8     | Neural precursor cell expressed, developmentally down-regulated 8         | 0.15  |
| 5 SSR4      | Signal sequence receptor, delta                                           | 0.10  |
| 6 SEC11C    | SEC11 homolog C                                                           | -0.01 |
| 7 CALM2     | Calmodulin 2 (phosphorylase kinase, delta)                                | -0.25 |
| 8 PRDX1     | Peroxiredoxin 1                                                           | 0.14  |
| 9 HSP90B1   | Heat shock protein 90kDa beta (Grp94), member 1                           | 0.55  |
| 10 SEC11A   | SEC11 homolog A ( <i>S. cerevisiae</i> ) (SEC11A)                         | 0.31  |
| 11 PSMC3    | Proteasome (prosome, macropain) 26S subunit, ATPase, 3                    | 0.44  |
| 12 SPCS3    | Signal peptidase complex subunit 3 homolog                                | 0.31  |
| 13 TRAM1    | Translocation associated membrane protein 1                               | 0.24  |
| 14 SPCS2    | Signal peptidase complex subunit 2 homolog                                | 0.01  |
| 15 BCAP31   | B-cell receptor-associated protein 31 (BCAP31)                            | -0.21 |
| 16 CALR     | Calreticulin (CALR)                                                       | 0.25  |
| 17 PSMD7    | Proteasome (Prosome, Macropain) 26S Subunit, Non-ATPase, 7                | -0.15 |
| 18 UFM1     | Ubiquitin-fold modifier 1                                                 | 0.16  |
| 19 PPIA     | Peptidylprolyl isomerase A (cyclophilin A)                                | -0.22 |
| 20 LMAN1    | Lectin, mannose-binding, 1                                                | -0.09 |
| 21 COPG     | Coatamer protein complex, subunit gamma                                   | 0.00  |
| 22 NPM1     | Nucleophosmin (nucleolar phosphoprotein B23, numatrin)                    | 0.16  |
| 23 HSPA8    | Heat shock 70kDa protein 8                                                | -0.75 |
| 24 SQSTM1   | Sequestosome 1                                                            | 0.68  |
| 25 ERP29    | Endoplasmic reticulum protein 29                                          | -1.74 |
| 26 PSMA3    | Proteasome (prosome, macropain) subunit, alpha type, 3                    | -0.69 |
| 27 PSME2    | Proteasome (prosome, macropain) activator subunit 2 (PA28 beta)           | 0.03  |
| 28 ARF1     | ADP-ribosylation factor 1 (ARF1), transcript variant 4                    | 0.29  |
| 29 CYTH1    | Cytohesin 1 (CYTH1), transcript variant 2                                 | -1.59 |
| 30 FBXW5    | F-box and WD repeat domain containing 5                                   | 1.04  |
| 31 GNB2L1   | Guanine nucleotide binding protein (G protein), beta polypeptide 2-like 1 | -0.31 |
| 32 NFE2L1   | Nuclear factor (erythroid-derived 2)-like 1                               | 0.69  |
| 33 ORMDL3   | ORM1-like 3                                                               | 0.10  |
| 34 SRPR     | Signal recognition particle receptor (docking protein)                    | -0.14 |
| 35 TRIM28   | Tripartite motif containing 28                                            | 1.25  |
| 36 YKT6     | YKT6 v-SNARE homolog                                                      | 0.31  |
| 37 HSP90AB1 | Heat shock protein 90kDa alpha (cytosolic), class B member 1              | -0.52 |

**Figure 9. Proteotoxicity response genes whose translation is inhibited in mutant eIF-4E-containing MM cells.** List of genes involved in proteotoxic responses with significant decreases in translational efficiency.  
doi:10.1371/journal.pone.0094011.g009

proteins must occur. Our results suggest that the MNK/eIF-4E pathway may provide one mechanism for this response while maintaining the repressed level of overall global translation. Furthermore, the high percentage of genes regulated translationally by eIF-4E phosphorylation involved in ER function and responses to proteotoxic stress underscore the fine line that the MM cell must walk between translation required for clonal expansion and translation that is toxic.

An important clinical issue is whether MNK activity is only important in IL-6 MM responses or is similarly involved in constitutive growth or MM cell growth stimulated by other factors like IGF-1 or triggers from the marrow microenvironment. Although CGP57380 and MNK knockdown did not significantly

affect MM cell growth in the absence of IL-6 in cell lines, in two primary MM specimens there was significant cytorreduction induced by CGP57380 in the absence of IL-6. Additional primary specimens will have to be tested to address this issue.

MM cell growth requires lipids to replicate cellular membranes. Additional responses to continued ER stress require lipids for maintenance of an expanded ER membrane capacity. Thus, maintenance of lipid synthesis during IL-6 stimulation would be critical to allow for cell growth. It is not surprising, therefore, that several of the eIF-4E phosphorylation-dependent genes are involved with lipid metabolism, including fatty acid synthetase (FASN), stearoyl-coA desaturase (SCD), lanosterol synthase (LSS) and mevalonate decarboxylase (MVD). Indeed, interruption of

MM cell lipid metabolism is the hypothetical goal of several new therapeutic strategies in myeloma [37,38]. EIF-4E phosphorylation also regulated translation of the enolase gene (ENO1, (#5 in fig 7A)), a glycolytic enzyme, also known as c-myc promoter binding protein (MBP-1). In U266 and ANBL-6 MM cells, IL-6 is known to upregulate ENO1/MBP-1 mRNA levels [39] supporting the notion that it is important in IL-6 responses. Our data indicate that after IL-6-induced transcription, ENO1/MBP-1 translation depends upon the phosphorylation status of eIF-4E.

Although several genes specifically involved in proliferation and viability were regulated by eIF-4E phosphorylation, such as cyclin D2 and PIM-2, it was notable that expression of some well known myeloma-associated genes like c-myc and VEGF were not. Immunoblot assay of eIF-4E-mutation-containing MM cells (vs EV cells) confirmed expression of these genes was independent of eIF-4E function (data not shown). One possible explanation for these results is that these genes are translated during IL-6 stimulation through alternative pathways. They have well-defined internal ribosome entry site (IRES) sequences in their 5'UTRs which are highly active in the MM tumor model [40,41]. For example, in our prior work [29], we documented the importance of the c-myc IRES in upregulated myc translation secondary to IL-6 exposure. In addition, in similar ribosome protection profiling of cells treated with the mTOR inhibitor torin, genes containing known IRESes were resistant to inhibited translation [21]. It is, thus, not surprising that translation of these key genes is not regulated by eIF-4E phosphorylation.

In summary, our data underscores the importance of MNK kinase activation in the IL-6-induced growth response of MM cells. MNK-induced phosphorylation of eIF-4E upregulates translation of a select number of transcripts, which are important for the response, but does not significantly increase global translation. As the MNKs are dispensable for normal physiology [2], they may be good targets for therapy in myeloma. There are several MNK/eIF-4E inhibitors identified in pre-clinical studies [28,42] that are under development. Multiple myeloma is a promising tumor model for their study.

## Supporting Information

**Figure S1 ANBL-6 MM cells cultured +/- CGP (25 uM) for 72 hrs in the presence or absence of increasing**

## References

- Kentsis A, Topisirovic I, Culjkovic B, Shao L, Borden KLB (2004) Ribavirin suppresses eIF4E-mediated oncogenic transformation by physical mimicry of the 7-methyl guanosine mRNA cap. *Proc Natl Acad Sci* 101:18105–18110.
- Ueda T, Watanabe-Fukunaga R, Fukuyama H, Nagata S, et al. (2004) MNK2 and MNK1 are essential for constitutive and inducible phosphorylation of eIF-4E but not for cell growth or development. *Mol. Cell Biol.* 24: 6539–6549.
- Wendel HG, Silva RL, Malina A, Mills JR, Zhu H, et al. (2007) Dissecting eIF4E action in tumorigenesis. *Genes & Dev* 21:3232–3237.
- Furic L, Rong L, Larsson O, Koumakpayi I, Yoshida K, et al. (2010) eIF4E phosphorylation promotes tumorigenesis and is associated with prostate cancer progression. *Proc Natl Acad Sci* 107:14134–14139.
- Ueda T, Sasaki M, Elia AL, Chio I, Hamada K, et al. (2010) Combined deficiency for MAP kinase-interacting kinase 1 and 2 (MNK 1 and MNK 2) delays tumor development. *Proc Natl Acad Sci* 107:13984–13990.
- Pellagatti A, Vetric D, Langford CD, Gama S, Eagleton H, et al. (2003) Gene expression profiling in polycythemia vera using cDNA microarray technology. *Cancer Res* 63:3940–3944.
- Worch J, Tickenbrock L, Schwabe J, Steffen B, Cauvet T, et al. (2004) The serine-threonine kinase MNK1 is post-translationally stabilized by PML-RARalpha and regulates differentiation of hematopoietic cells. *Oncogene* 23:9162–9172.
- Bredel M, Bredel C, Juric D (2005) High resolution genome-wide mapping of genetic alterations in human glial brain tumors. *Cancer Res* 65:4088–4096.
- Fan S, Ramalingam SS, Kauh J, Xu Z, Khuri FR, et al. (2009) Phosphorylated eIF4E is elevated in human cancer tissues. *Cancer Biol Ther* 8:1463–1469.
- Yoshizawa A, Fukuoka J, Shimizu S, Shilo K, Franks TJ, et al. (2010) Overexpression of phospho-eIF4E is associated with survival through AKT pathway in non-small cell lung cancer. *Clin Cancer Res* 16:240–248.
- Lazaris-Karatzas A, Montine KS, Sonenberg N (1990) Malignant transformation by a eukaryotic initiation factor subunit that binds to mRNA 5'cap. *Nature* 345:544–547.
- Topisirovic I, Ruiz-Gutierrez M, Borden KL (2004) Phosphorylation of the eIF4E contributes to its transformation and mRNA transport activities. *Cancer Res* 64:8639–8642.
- Ogata A, Chauhan D, Teoh G, Treon S, Urashima M, et al. (1999) IL-6 triggers cell growth via the RAS-dependent mitogen-activated protein kinase cascade. *J Immunol* 159:2212–2221.
- Fukunaga R, Hunter T (1997) MNK1, a new MAP kinase-activated protein kinase, isolated by a novel expression screening method for identifying protein kinase substrates. *EMBO J* 16:1921–1997.
- Hoang B, Frost P, Shi Y, Belanger E, Benavides A, et al. (2010) Targeting TORC2 in multiple myeloma with a new mTOR kinase inhibitor. *Blood* 116: 4560–4568.
- Sharma S, Nemeth E, Chen Y, Goodnough J, Huston A, et al. (2008) Involvement of hepcidin in the anemia of multiple myeloma. *Clin Cancer Res* 14:3262–3267.
- Waskiewicz AJ, Flynn A, Proud CG, Cooper JA (1997) Mitogen-activated protein kinases activate the serine/threonine kinases MNK1 and MNK2. *EMBO J* 16:1909–1920.

**concentrations of rIL-6.** Data represent number of viable cells recovered, mean+/-SD, n=3. CGP significantly (p<0.05) reduced the number of viable cells at all concentrations of IL-6 (but not in the absence of IL-6). (TIF)

**Figure S2 ANBL-6 or 8226 cells cultured +/- IL-6 (500 U/ml) and +/- CGP (25 uM) for 48 or 72 hrs after which apoptosis assayed by flow cytometric analysis of activated caspase 3.** Data are means of 3 separate experiments. SDs were <10% of the means for all groups (not shown). As a positive control, staurosporine, at 1 uM, induced ANBL-6 and 8226 apoptosis (76% and 71% caspase 3+ cells, respectively). (DOC)

**Figure S3 A)** shRNA-transfected 8226 MM cells to silence hn RNP A1 showing loss of A1 expression vs EV cells (transfected with shRNA expressing a scramble sequence (SCR)). **B)** MM cells expressing empty vectors (EVs) or shRNA for hn RNP A1 (sh1 or sh2) or wild type (WT) eIF-4E or SA dominant negative eIF-4E phospho-mutant. Cells stimulated +/- LPS and TNF-alpha expression assessed by ELISA. Data are means+/-SD of 3 experiments. \*denotes statistically significant difference (p<0.05) from corresponding EV cells. (TIF)

**Figure S4 Proliferation, RNA-binding protein, and translational machinery genes showing inhibited translational efficiency due to eIF-4E mutation.** (TIF)

**Figure S5 Cytoskeleton, adhesion proteins & other genes that demonstrate inhibited translational efficiency due to eIF-4E mutation.** (TIF)

## Author Contributions

Conceived and designed the experiments: PF BH CB JG AL. Performed the experiments: YS YY. Analyzed the data: YS PF CB JG AL. Contributed reagents/materials/analysis tools: PF YY. Wrote the paper: AL.

18. Frost P, Moatamed F, Hoang B, Shi Y, Gera J, et al. (2004) In vivo antitumor effects of the mTOR inhibitor CCI-779 against human multiple myeloma cells in a xenograft model. *Blood* 104(13):4181–87.
19. Lock R, Roy S, Kenific C (2011) Autophagy facilitates glycolysis during Ras-mediated oncogenic transformation. *Mol Biol of the Cell* 22:165–178.
20. Ingolia N, Ghaemmaghami S, Newman J, Weissman J (2009) Genome wide analysis in vivo of translation with nucleotide resolution using ribosome profiling. *Science* 324:218–223.
21. Thoreen C, Chantranupong L, Keys H, Wang T, Gray N, et al. (2012) A unifying model for mTORC1-mediated regulation of mRNA translation. *Nature* 485:109–113.
22. Jernberg-Wiklund H, Pettersson M, Carlsson M, Nilsson K (1992) Increase in IL-6 and IL-6 receptor expression in a human multiple myeloma cell line, U-266, during long term in vitro culture and the development of a possible autocrine IL-6 loop. *Leukemia* 6:310–318.
23. Parra JL, Buxade M, Proud CG (2005) Features of the catalytic domains and C termini of the MAPK signal-integrating kinases MNK1 and MNK2 determine their differing activities and regulatory properties. *J. Biol. Chem.* 280: 37623–37633.
24. Billadeau D, Jelinek DF, Shah N, LeBien TW, Van Ness B (1995) Introduction of an activated N-ras oncogene alters the growth characteristics of the IL-6-dependent myeloma cell line ANBL6. *Cancer Res* 55:3640–3646.
25. Knauf U, Tschopp C, Gram H (2001) Negative regulation of protein translation by mitogen-activated protein kinase-interacting kinases 1 and 2. *Mol cell Biol* 21:5500–5511.
26. Buxade M, Parra JL, Rousseau S, Shpiro N, Marquez R, et al. (2005) The MNKs are novel components in the control of TNF alpha biosynthesis and phosphorylate and regulate hnRNP A1. *Immunity* 23:177–189.
27. Bain J, Plater L, Elliot M, Shpiro N, Hastie CJ, et al. (2007) The selectivity of protein kinase inhibitors: a further update. *Biochem J* 408:297–315.
28. Konicek BW, Stephens JR, McNulty AM, Robichaud N, Peery RB, et al. (2011) Therapeutic inhibition of MAP kinase interacting kinase blocks eukaryotic initiation factor 4E phosphorylation and suppresses outgrowth of experimental lung metastases. *Cancer Res* 71: 1849–57.
29. Shi Y, Frost PJ, Hoang B, Gera J, Lichtenstein A (2008) IL-6-induced stimulation of c-myc translation in multiple myeloma cells is mediated by myc IRES function and the RNA-binding protein hnRNP A1. *Cancer Res* 68: 10215–10222.
30. Hsieh A, Liu Y, Edlind M, Ingolao N, Janes M, et al. (2012) The translational landscape of mTOR signaling steers cancer initiation and metastasis. *Nature* 485:55–61.
31. Munshi N, Hideshima T, Carrasco D, Shammam M, Auclair D, et al. (2004) Identification of genes modulated in multiple myeloma using genetically identical twin samples. *BLOOD* 103:1799–1806.
32. Carrasco DR, Sukhdeo K, Protopopova M, Sinha R, Eno S M, et al. (2007) The differentiation and stress response factor XBP-1 drives multiple myeloma pathogenesis. *Cancer Cell* 11:349–360.
33. Obeng EA, Carlson LM, Gutman DM, Harrington WJ, Lee KP, et al. (2006) Proteasome inhibitors induce a terminal unfolded protein response in multiple myeloma cells. *BLOOD* 107:4907–4916.
34. Suzuki A, Iida S, Kato-Uranishi M, Tajima E, Zhan F, et al. (2005) ARK5 is transcriptionally regulated by the large MAF family and mediates IGF-1-induced cell invasion in multiple myeloma: ARK5 as a new molecular determinant of multiple myeloma. *Oncogene* 24:6936–6944.
35. Peterson TR, Laplante M, Thoreen CC, Sancak Y, Kang S, et al. (2009) DEPTOR is an mTOR inhibitor frequently overexpressed in multiple myeloma cells and required for their survival. *Cell* 137:873–886.
36. Liu L, Ulbrich J, Muller J, Wustfeld T, Aeberhard L, et al. (2012) Deregulated MYC expression induces dependence upon AMPK-related kinase 5. *Nature* 2012; 483:608–612.
37. Clendening J, Pandya A, Li Z, Boutros P, Martirosyan A, et al. (2010) Exploiting the mevalonate pathway to distinguish statin-sensitive multiple myeloma. *BLOOD* 115:4787–4797.
38. Tirado-Velez JM, Joumady I, Saez-Benito, Cozar-Castellano I, Perdomo G (2012) Inhibition of fatty acid metabolism reduces human myeloma cells proliferation. *PLoS One* 7:e46484.
39. Wen XY, Stewart A, Sooknanan RR (1999) Identification of c-myc promoter-binding protein and XBP-1 as interleukin-6 target genes in human myeloma cells. *Int J Oncol* 15:173–178.
40. Paulin FE, West MJ, Sullivan NF, Whitney RL, Lyne L, et al. (1996) Aberrant translational control of the c-myc gene in multiple myeloma. *Oncogene* 13:505–513.
41. Frost P, Shi Y, Hoang B, Lichtenstein A (2007) AKT activity regulates the ability of mTOR inhibitors to prevent angiogenesis and VEGF expression in multiple myeloma cells. *Oncogene* 26:2255–2262.
42. Assouline S, Culjkovic B, Cocolakis E, Rousseau C, Beslu N, et al. (2009) Molecular targeting of the oncogenic eIF-4E in AML: A proof of principle clinical trial with ribavirin. *BLOOD* 114:257–260.
